# Supplementary material
Source: Royal Society of Chemistry journal article supplement (doi:10.1039/d6tc00431h)
Supplement: d6tc00431h1.pdf [file d6tc00431h1.pdf]

## SUPPORTING

---

### Supporting Information

# **Synergistic Dual-Modification Strategy of $\pi$ -Conjugated Cations and Tetrahedra: Rational Design of Ultraviolet High-Birefringence Monofluorophosphates**

Huan Zhou,<sup>a, b</sup> Meng Cheng,<sup>a, b</sup> Yuqi Qin,<sup>a</sup> Congwei Xie,<sup>a, b</sup> Junjie Li,<sup>a, b</sup> Xueling Hou,<sup>\*,a, b</sup> and Zihua Yang<sup>\*,a, b</sup>

<sup>a</sup>Research Center for Crystal Materials; CAS Key Laboratory of Functional Materials and Devices for Special Environmental Conditions; Xinjiang Key Laboratory of Functional Crystal Materials; Xinjiang Technical Institute of Physics and Chemistry, Chinese Academy of Sciences, 40-1 South Beijing Road, Urumqi 830011, China.

<sup>b</sup>Center of Materials Science and Optoelectronics Engineering, University of Chinese Academy of Sciences, Beijing 100049, China.

\*E-mails: zhyang@ms.xjb.ac.cn (Z. Yang); xlhou@ms.xjb.ac.cn (X. Hou)

\*Corresponding author

# SUPPORTING

## Experimental Procedures

### Synthesis

All of the chemicals were of analytical grade from commercial sources and used without further purification.  $\text{CH}_6\text{N}_4 \cdot \text{H}_2\text{CO}_3$  (Aladdin, 98.5%), HCl (AR),  $\text{Na}_2\text{PO}_3\text{F}$  (Macklin, 98 %),  $\text{C}_3\text{H}_6\text{O}$  (99 %), and HF were purchased from Macklin.

Two compounds were synthesized at room temperature without additional heating. The millimeter-sized single crystals of  $(\text{CN}_4\text{H}_7)_2\text{PO}_3\text{F} \cdot \text{H}_2\text{O}$  and  $(\text{C}_4\text{N}_4\text{H}_{11})_2\text{PO}_3\text{F} \cdot \text{H}_2\text{O}$  were obtained by the solution volatilization method.

Growth of  $(\text{CN}_4\text{H}_7)_2\text{PO}_3\text{F} \cdot \text{H}_2\text{O}$  crystals by evaporation method:

- A solution was prepared by adding  $\text{CH}_6\text{N}_4 \cdot \text{H}_2\text{CO}_3$  (10 mmol) and 10 mL of distilled water to a 250 mL plastic beaker, followed by the slow addition of HF solution to induce  $\text{CO}_2$  gas evolution. This mixture was designated as Solution A.
- $\text{Na}_2\text{PO}_3\text{F}$  (5 mmol) was added to Solution A, and the mixture was stirred thoroughly to ensure homogeneity.
- The crystals were isolated from the mother liquor following natural evaporation, with care taken to prevent complete evaporation of the solution.

Growth of  $(\text{C}_4\text{N}_4\text{H}_{11})_2\text{PO}_3\text{F} \cdot \text{H}_2\text{O}$  crystals by evaporation method:

- A solution was prepared by adding  $\text{CH}_6\text{N}_4 \cdot \text{H}_2\text{CO}_3$  (10 mmol) and 20 mL of distilled water to a 250 mL plastic beaker, followed by the slow addition of HCl solution to induce  $\text{CO}_2$  gas evolution. This mixture was designated as Solution B.
- $\text{Na}_2\text{PO}_3\text{F}$  (5 mmol) and 100 ml  $\text{C}_3\text{H}_6\text{O}$  were added to Solution B, and the mixture was stirred thoroughly to ensure homogeneity.
- The crystals were isolated from the mother liquor following natural evaporation, with care taken to prevent complete evaporation of the solution.

### Structural Determination

To perform the structural characterization of the as-synthesized samples, plate-shaped single crystals with suitable sizes of the title compounds were selected under an optical microscope. Single-crystal X-ray diffraction data of the two compounds were collected on a Bruker D8 Venture diffractometer assembled with monochromatic Mo-K $\alpha$  ( $\lambda = 0.71073 \text{ \AA}$ ) as the radiation source. By using the Bruker SAINT program, data integration was performed.<sup>1</sup> The structure of the two crystals was determined by the direct method and refined through the SHELXTL system using Olex2 software.<sup>2,3</sup> The positions of all the atoms were refined by full matrix least-squares techniques. The PLATON program was used to confirm the above structures as no higher symmetry was recommended.<sup>4</sup>

### Powder X-ray Diffraction

The purity of polycrystalline powder samples of the two compounds was confirmed using the Bruker D2 PHASER X-ray diffractometer with Cu K $\alpha$  radiation ( $\lambda = 1.5418 \text{ \AA}$ ), and the diffraction data were collected in the  $2\theta$  range from 5 to 50 ° (step size: 0.02 °), respectively.

### Spectral Analysis

The infrared (IR) absorption spectra were measured to confirm the presence of the anionic units of  $(\text{CN}_4\text{H}_7)_2\text{PO}_3\text{F} \cdot \text{H}_2\text{O}$  and  $(\text{C}_4\text{N}_4\text{H}_{11})_2\text{PO}_3\text{F} \cdot \text{H}_2\text{O}$  on a SHIMADZU IR-Affinity-1 Fourier Transform IR spectrometer in the range of 400–4000  $\text{cm}^{-1}$ . Polycrystalline powders of the two compounds were mixed with dried KBr in a mass ratio of 1:100 to prepare the samples tested. To determine the cutoff edge of  $(\text{CN}_4\text{H}_7)_2\text{PO}_3\text{F} \cdot \text{H}_2\text{O}$  and  $(\text{C}_4\text{N}_4\text{H}_{11})_2\text{PO}_3\text{F} \cdot \text{H}_2\text{O}$ , UV-vis-NIR transmittance spectra were measured by a Shimadzu SolidSpec-3700DUV spectrophotometer at room temperature.

### Computational Details and Methods

The electronic structures as well as optical properties of  $(\text{CN}_4\text{H}_7)_2\text{PO}_3\text{F} \cdot \text{H}_2\text{O}$  and  $(\text{C}_4\text{N}_4\text{H}_{11})_2\text{PO}_3\text{F} \cdot \text{H}_2\text{O}$  were determined employing the CASTEP package based on density functional theory (DFT) with the norm-conserving pseudopotentials (NCP).<sup>5,6</sup> The functionals developed by Perdew-Burke-Ernzerhof (PBE) in generalized gradient approximation (GGA)<sup>7</sup> form were adopted to model the exchange-correlation terms in the Hamiltonian. The plane-wave energy cutoff of  $(\text{CN}_4\text{H}_7)_2\text{PO}_3\text{F} \cdot \text{H}_2\text{O}$  and  $(\text{C}_4\text{N}_4\text{H}_{11})_2\text{PO}_3\text{F} \cdot \text{H}_2\text{O}$  was set at 850 and 940 eV. Self-consistent field (SCF) calculations were performed with a convergence criterion of  $10^{-6}$  and  $5.0 \times 10^{-6}$  eV/atom on the total energy. The k-points of the Monkhorst-Pack grid used in the calculation of  $(\text{CN}_4\text{H}_7)_2\text{PO}_3\text{F} \cdot \text{H}_2\text{O}$  and  $(\text{C}_4\text{N}_4\text{H}_{11})_2\text{PO}_3\text{F} \cdot \text{H}_2\text{O}$  are  $5 \times 1 \times 2$  and  $5 \times 4 \times 3$ . Besides, the contribution of planar  $\pi$ -conjugated cations,  $[\text{PO}_3\text{F}]$ , and  $[\text{H}_2\text{O}]$  units to the birefringence of  $(\text{CN}_4\text{H}_7)_2\text{PO}_3\text{F} \cdot \text{H}_2\text{O}$  and  $(\text{C}_4\text{N}_4\text{H}_{11})_2\text{PO}_3\text{F} \cdot \text{H}_2\text{O}$  were further investigated using the real space atom-cutting method. The cutting radii of C, N, O, P, F, and H were set as 0.77, 0.75, 0.73, 1.06, 0.72, and 0.32  $\text{Å}$ , respectively.

The HOMO–LUMO gap, energy level, and polarizability anisotropy of functional units were calculated using DFT implemented by the Gaussian09 package.<sup>8</sup> The B3LYP (Becke, three-parameter, Lee–Yang–Parr) exchange-correlation functional with the Lee–Yang–Parr correlation functional at the 6-31G+ and 6-31G++ basis set in Gaussian was employed.

The linear optical properties of the title compounds including the dielectric function  $\varepsilon(\omega)$  is obtained based on the following equations<sup>9–11</sup>:

$$\varepsilon(\omega) = \varepsilon_1(\omega) + i\varepsilon_2(\omega) \quad (1)$$

$$\varepsilon_2(\omega) = \frac{4\pi^2 e^2}{\Omega} \lim_{q \rightarrow 0} \frac{1}{q^2} \times \sum_{c,v,k} 2\omega_k \delta(E_c - E_k - \omega) | \langle c | e \cdot q | v \rangle |^2 \quad (2)$$

where,  $\varepsilon_1(\omega)$  and  $\varepsilon_2(\omega)$  are the real and the imaginary part of the dielectric function, respectively. According to the formula (2),  $\varepsilon_2(\omega)$  is determined by the integrated optical transitions  $| \langle c | e \cdot q | v \rangle |$  from the valence states ( $v$ ) to the conduction states ( $c$ ), and  $e, q$  denotes the polarization direction of the photon and the electron momentum operator, respectively. The real part of the dielectric function  $\varepsilon_1(\omega)$  can be obtained from the imaginary part of the dielectric function  $\varepsilon_2(\omega)$  based on the Kramers-Kronig transformation<sup>12</sup>:

## SUPPORTING

---

$$\varepsilon_1(\omega) = 1 + \frac{2}{\pi} P \int_0^{\infty} \frac{\Omega \varepsilon_2(\Omega)}{\Omega^2 - \omega^2} d\Omega \quad (3)$$

Then the refractive index  $n(\omega)$  (and the birefringence  $\Delta n$ ) can be calculated by using the following equation:

$$n(\omega) = \frac{1}{\sqrt{2}} \left\{ \left[ \sqrt{\varepsilon_1^2(\omega) + \varepsilon_2^2} + \varepsilon_1(\omega) \right] \right\}^{\frac{1}{2}} \quad (4)$$

## SUPPORTING

**Table S1.** Crystal data and structure refinement for  $(C_4N_4H_{11})_2PO_3F \cdot H_2O$ .

| Formula                                                | $(C_4N_4H_{11})_2PO_3F \cdot H_2O$                            |
|--------------------------------------------------------|---------------------------------------------------------------|
| Formula weight                                         | 346.32                                                        |
| Temperature / K                                        | 298                                                           |
| Crystal system                                         | Triclinic                                                     |
| Space group                                            | $P\bar{1}$                                                    |
| $a / \text{Å}$                                         | 7.3372(6)                                                     |
| $b / \text{Å}$                                         | 9.0541(8)                                                     |
| $c / \text{Å}$                                         | 12.6489(10)                                                   |
| $\alpha / ^\circ$                                      | 96.383(3)                                                     |
| $\beta / ^\circ$                                       | 96.496(3)                                                     |
| $\gamma / ^\circ$                                      | 97.670(3)                                                     |
| Volume / $\text{Å}^3$                                  | 820.59(12)                                                    |
| $Z$                                                    | 2                                                             |
| $\rho_{\text{calc}} / \text{g/cm}^3$                   | 1.402                                                         |
| $\mu / \text{mm}^{-1}$                                 | 0.208                                                         |
| $F(000)$                                               | 368.0                                                         |
| Radiation                                              | Mo $K\alpha$ ( $\lambda = 0.71073$ )                          |
| $2\theta$ range for data collection / $^\circ$         | 3.268 to 50.678                                               |
| Index ranges                                           | $-8 \leq h \leq 8, -10 \leq k \leq 10, -15 \leq l \leq 15$    |
| Reflections collected                                  | 11366                                                         |
| Independent reflections                                | 2990 [ $R_{\text{int}} = 0.0371, R_{\text{sigma}} = 0.0333$ ] |
| Completeness (%)                                       | 99.9                                                          |
| Data/restraints/parameters                             | 2990 / 1 / 216                                                |
| Goodness-of-fit on $F^2$                               | 1.042                                                         |
| Final $R$ indices [ $I \geq 2\sigma(I)$ ] <sup>a</sup> | $R_1 = 0.0398, wR_2 = 0.1072$                                 |
| Final $R$ indices (all data) <sup>a</sup>              | $R_1 = 0.0461, wR_2 = 0.1130$                                 |
| Largest diff. peak/hole / $e \text{ Å}^{-3}$           | 0.34 / -0.34                                                  |

<sup>a</sup> $R_1 = \sum(|F_o| - |F_c|) / \sum|F_o|$  and  $wR_2 = [\sum w(F_o^2 - F_c^2)^2 / \sum wF_o^4]^{1/2}$  for  $F_o^2 > 2\sigma(F_o^2)$

## SUPPORTING

**Table S2.** Atomic coordinates ( $\times 10^4$ ) and equivalent isotropic displacement parameters ( $\text{\AA}^2 \times 10^3$ ) for  $(\text{C}_4\text{N}_4\text{H}_{11})_2\text{PO}_3\text{F}\cdot\text{H}_2\text{O}$ .  $U(\text{eq})$  is defined as one-third of the trace of the orthogonalized  $U_{ij}$  tensor.

| atom | x       | y        | z        | $U(\text{eq})$ |
|------|---------|----------|----------|----------------|
| C(1) | 5919(3) | 4419(2)  | 8581(2)  | 29(1)          |
| C(2) | 3431(4) | 1032(3)  | 10735(2) | 54(1)          |
| C(3) | 3122(3) | 1986(2)  | 9862(2)  | 34(1)          |
| C(4) | 1210(3) | 1850(3)  | 9303(3)  | 57(1)          |
| C(5) | 2011(3) | -2853(2) | 4489(2)  | 34(1)          |
| C(6) | 4092(4) | 363(3)   | 7004(2)  | 55(1)          |
| C(7) | 3213(3) | 698(2)   | 5956(2)  | 40(1)          |
| C(8) | 3113(4) | 2301(3)  | 5815(2)  | 56(1)          |
| N(1) | 7509(2) | 4119(2)  | 9038(1)  | 40(1)          |
| N(2) | 5862(2) | 5308(2)  | 7824(1)  | 35(1)          |
| N(3) | 4335(2) | 3761(2)  | 8870(1)  | 31(1)          |
| N(4) | 4545(2) | 2838(2)  | 9675(1)  | 34(1)          |
| N(5) | 1988(3) | -4261(2) | 4690(2)  | 43(1)          |
| N(6) | 1521(3) | -2542(2) | 3514(1)  | 43(1)          |
| N(7) | 2595(3) | -1778(2) | 5309(1)  | 38(1)          |
| N(8) | 2535(2) | -284(2)  | 5158(1)  | 38(1)          |
| P(1) | 1093(1) | 6262(1)  | 7651(1)  | 29(1)          |
| O(1) | 949(2)  | 4844(2)  | 8167(1)  | 48(1)          |
| O(2) | 2673(2) | 6460(2)  | 7002(1)  | 40(1)          |
| O(3) | -739(2) | 6508(2)  | 7092(1)  | 37(1)          |
| O(4) | -942(4) | -500(2)  | 6886(2)  | 85(1)          |
| F(1) | 1576(2) | 7572(2)  | 8608(1)  | 60(1)          |

**Table S3.** Bond lengths [ $\text{\AA}$ ] and angles [deg] for  $(\text{C}_4\text{N}_4\text{H}_{11})_2\text{PO}_3\text{F}\cdot\text{H}_2\text{O}$ .

|                |            |                |            |
|----------------|------------|----------------|------------|
| C(1)-N(1)      | 1.317(2)   | C(6)-C(7)      | 1.488(3)   |
| C(1)-N(2)      | 1.318(2)   | C(7)-C(8)      | 1.493(3)   |
| C(1)-N(3)      | 1.341(2)   | C(7)-N(8)      | 1.275(3)   |
| C(2)-C(3)      | 1.491(3)   | N(3)-N(4)      | 1.396(2)   |
| C(3)-C(4)      | 1.482(3)   | N(7)-N(8)      | 1.392(2)   |
| C(3)-N(4)      | 1.273(3)   | P(1)-O(1)      | 1.5007(15) |
| C(5)-N(5)      | 1.326(3)   | P(1)-O(2)      | 1.4969(14) |
| C(5)-N(6)      | 1.316(3)   | P(1)-O(3)      | 1.5022(14) |
| C(5)-N(7)      | 1.331(3)   | P(1)-F(1)      | 1.5710(14) |
| C(1)-N(3)-N(4) | 115.40(15) | N(2)-C(1)-N(3) | 119.86(17) |
| C(2)-C(3)-C(4) | 117.23(19) | N(5)-C(5)-N(6) | 121.1(2)   |
| C(2)-C(3)-N(4) | 116.09(19) | N(5)-C(5)-N(7) | 116.96(18) |
| C(3)-N(4)-N(3) | 118.55(16) | N(6)-C(5)-N(7) | 121.93(18) |
| C(4)-C(3)-N(4) | 126.68(19) | C(6)-C(7)-N(8) | 125.0(2)   |
| C(5)-N(7)-N(8) | 119.32(17) | O(1)-P(1)-O(2) | 113.99(9)  |
| C(6)-C(7)-C(8) | 118.2(2)   | O(1)-P(1)-O(3) | 112.40(8)  |
| C(7)-N(8)-N(7) | 116.31(18) | O(1)-P(1)-F(1) | 105.18(10) |
| C(8)-C(7)-N(8) | 116.9(2)   | O(2)-P(1)-O(3) | 114.62(8)  |
| N(1)-C(1)-N(2) | 121.17(17) | O(2)-P(1)-F(1) | 104.89(9)  |
| N(1)-C(1)-N(3) | 118.94(17) | O(3)-P(1)-F(1) | 104.48(8)  |

## SUPPORTING

**Table S4.** Hydrogen bonds for  $(C_4N_4H_{11})_2PO_3F \cdot H_2O$ .

| D-H...A             | d(D-H)/Å | d(H...A)/Å | d(D...A)/Å | D-H...A <sup>o</sup> |
|---------------------|----------|------------|------------|----------------------|
| N(1)-H(1)...O(1)#1  | 0.88     | 2.04       | 2.891(2)   | 164.1                |
| N(2)-H(3)...O(3)#1  | 0.88     | 2.00       | 2.877(2)   | 176.4                |
| N(2)-H(4)...O(2)    | 0.88     | 1.97       | 2.826(2)   | 165.1                |
| N(3)-H(5)...O(1)    | 0.88     | 2.02       | 2.875(2)   | 162.4                |
| N(5)-H(14)...O(3)#3 | 0.88     | 1.97       | 2.842(2)   | 173.5                |
| N(5)-H(15)...O(2)#2 | 0.88     | 2.14       | 2.897(2)   | 144.0                |
| N(6)-H(12)...O(4)#3 | 0.88     | 2.23       | 3.047(3)   | 153.5                |
| N(6)-H(13)...O(4)#3 | 0.88     | 2.07       | 2.932(3)   | 166.7                |
| N(7)-H(16)...O(2)#2 | 0.88     | 2.05       | 2.810(2)   | 144.4                |
| O(4)-H(24)...O(3)#2 | 0.99     | 2.13       | 2.772(2)   | 121.0                |
| O(4)-H(23)...N(8)#3 | 0.73     | 2.37       | 2.916(3)   | 132.7                |

Symmetry transformations used to generate equivalent atoms:

#1 x+1, y, z; #2 x, y-1, z; #3 -x,-y,-z+1

## SUPPORTING

**Table S5.** Crystal data and structure refinement for  $(\text{CN}_4\text{H}_7)_2\text{PO}_3\text{F}\cdot\text{H}_2\text{O}$ .

| Formula                                                | $(\text{CN}_4\text{H}_7)_2\text{PO}_3\text{F}\cdot\text{H}_2\text{O}$ |
|--------------------------------------------------------|-----------------------------------------------------------------------|
| Formula weight                                         | 266.20                                                                |
| Temperature / K                                        | 298                                                                   |
| Crystal system                                         | Monoclinic                                                            |
| Space group                                            | $P2_1/c$                                                              |
| $a / \text{\AA}$                                       | 4.9572(6)                                                             |
| $b / \text{\AA}$                                       | 20.492(3)                                                             |
| $c / \text{\AA}$                                       | 11.0338(16)                                                           |
| $\beta / ^\circ$                                       | 91.685(5)                                                             |
| Volume / $\text{\AA}^3$                                | 1120.4(3)                                                             |
| $Z$                                                    | 4                                                                     |
| $\rho_{\text{calc}} / \text{g/cm}^3$                   | 1.578                                                                 |
| $\mu / \text{mm}^{-1}$                                 | 0.279                                                                 |
| $F(000)$                                               | 560                                                                   |
| Radiation                                              | Mo $K\alpha$ ( $\lambda = 0.71073$ )                                  |
| $2\theta$ range for data collection/ $^\circ$          | 3.976 to 50.694                                                       |
| Index ranges                                           | $-5 \leq h \leq 5, -24 \leq k \leq 24, -13 \leq l \leq 13$            |
| Reflections collected                                  | 9709                                                                  |
| Independent reflections                                | 2040 [ $R_{\text{int}} = 0.0487, R_{\text{sigma}} = 0.0346$ ]         |
| Completeness (%)                                       | 99.9                                                                  |
| Data/restraints/parameters                             | 2040 / 0 / 150                                                        |
| Goodness-of-fit on $F^2$                               | 1.049                                                                 |
| Final $R$ indices [ $I \geq 2\sigma(I)$ ] <sup>a</sup> | $R_1 = 0.0349, wR_2 = 0.0863$                                         |
| Final $R$ indices (all data) <sup>a</sup>              | $R_1 = 0.0445, wR_2 = 0.0929$                                         |
| Largest diff. peak/hole / $e \text{\AA}^{-3}$          | 0.18 / - 0.30                                                         |

<sup>a</sup> $R_1 = \sum ||F_o| - |F_c|| / \sum |F_o|$  and  $wR_2 = [\sum w(F_o^2 - F_c^2)^2 / \sum wF_o^4]^{1/2}$  for  $F_o^2 > 2\sigma(F_o^2)$

## SUPPORTING

**Table S6.** Atomic coordinates ( $\times 10^4$ ) and equivalent isotropic displacement parameters ( $\text{\AA}^2 \times 10^3$ ) for  $(\text{CN}_4\text{H}_7)_2\text{PO}_3\text{F}\cdot\text{H}_2\text{O}$ .  $U(\text{eq})$  is defined as one-third of the trace of the orthogonalized  $U_{ij}$  tensor.

| atom | x        | y       | z       | $U(\text{eq})$ |
|------|----------|---------|---------|----------------|
| C(1) | 4301(4)  | 7945(1) | 3473(2) | 33(1)          |
| C(2) | 4333(4)  | 4577(1) | 3096(2) | 30(1)          |
| N(1) | 6481(4)  | 4827(1) | 3674(2) | 38(1)          |
| N(2) | 3080(4)  | 4068(1) | 3556(2) | 41(1)          |
| N(3) | 3475(4)  | 4839(1) | 2064(2) | 34(1)          |
| N(4) | 1239(4)  | 4561(1) | 1425(2) | 34(1)          |
| N(5) | 6394(4)  | 7643(1) | 3999(2) | 48(1)          |
| N(6) | 3169(4)  | 8445(1) | 4007(2) | 43(1)          |
| N(7) | 3405(4)  | 7729(1) | 2406(2) | 37(1)          |
| N(8) | 1263(4)  | 8050(1) | 1786(2) | 35(1)          |
| P(1) | 8022(1)  | 6290(1) | 1812(1) | 25(1)          |
| O(1) | 7698(3)  | 6204(1) | 3160(1) | 36(1)          |
| O(2) | 7234(3)  | 6954(1) | 1363(1) | 38(1)          |
| O(3) | 6964(3)  | 5737(1) | 1053(1) | 41(1)          |
| O(4) | 12684(3) | 6168(1) | 4416(1) | 46(1)          |
| F(1) | 11184(2) | 6267(1) | 1653(1) | 43(1)          |

**Table S7.** Bond lengths [ $\text{\AA}$ ] and angles [deg] for  $(\text{CN}_4\text{H}_7)_2\text{PO}_3\text{F}\cdot\text{H}_2\text{O}$ .

|                |            |                |            |
|----------------|------------|----------------|------------|
| C(1)-N(5)      | 1.327(3)   | N(3)-N(4)      | 1.416(2)   |
| C(1)-N(6)      | 1.317(3)   | N(7)-N(8)      | 1.409(2)   |
| C(1)-N(7)      | 1.322(3)   | P(1)-O(1)      | 1.5109(14) |
| C(2)-N(1)      | 1.328(3)   | P(1)-O(2)      | 1.4972(15) |
| C(2)-N(2)      | 1.323(3)   | P(1)-O(3)      | 1.4944(15) |
| C(2)-N(3)      | 1.319(3)   | P(1)-F(1)      | 1.5828(13) |
| C(1)-N(7)-N(8) | 120.28(17) | N(6)-C(1)-N(7) | 121.5(2)   |
| C(2)-N(3)-N(4) | 119.55(17) | O(1)-P(1)-O(2) | 113.40(9)  |
| N(1)-C(2)-N(2) | 119.94(19) | O(1)-P(1)-O(3) | 114.68(9)  |
| N(1)-C(2)-N(3) | 119.41(19) | O(1)-P(1)-F(1) | 103.91(8)  |
| N(2)-C(2)-N(3) | 120.65(19) | O(2)-P(1)-O(3) | 114.83(9)  |
| N(5)-C(1)-N(6) | 120.3(2)   | O(2)-P(1)-F(1) | 103.86(8)  |
| N(5)-C(1)-N(7) | 118.14(19) | O(3)-P(1)-F(1) | 104.38(8)  |

## SUPPORTING

**Table S8.** Hydrogen bonds for  $(\text{CN}_4\text{H}_7)_2\text{PO}_3\text{F}\cdot\text{H}_2\text{O}$ .

| D-H...A             | d(D-H)/Å | d(H...A)/Å | d(D...A)/Å | D-H...A <sup>o</sup> |
|---------------------|----------|------------|------------|----------------------|
| N(1)-H(1)...O(1)    | 0.88     | 2.15       | 2.945(2)   | 149.7                |
| N(1)-H(2)...O(4)#5  | 0.88     | 2.16       | 2.952(2)   | 149.7                |
| N(2)-H(3)...O(4)#5  | 0.88     | 2.31       | 3.062(2)   | 144.1                |
| N(2)-H(4)...N(8)#6  | 0.88     | 2.27       | 3.013(3)   | 142.3                |
| N(3)-H(5)...O(3)    | 0.88     | 1.93       | 2.781(2)   | 161.4                |
| N(4)-H(7)...O(3)#2  | 0.89     | 2.08       | 2.964(2)   | 172.7                |
| N(5)-H(8)...O(1)    | 0.88     | 2.34       | 3.163(3)   | 155.3                |
| N(5)-H(9)...O(2)#9  | 0.88     | 1.91       | 2.756(2)   | 161.7                |
| N(6)-H(10)...F(1)#8 | 0.88     | 2.55       | 3.163(2)   | 127.5                |
| N(6)-H(11)...N(4)#7 | 0.88     | 2.40       | 3.189(3)   | 148.9                |
| N(7)-H(12)...O(2)   | 0.88     | 1.95       | 2.752(2)   | 150.5                |
| N(8)-H(13)...O(2)#4 | 0.89     | 2.15       | 3.032(2)   | 168.0                |
| N(8)-H(14)...O(4)#3 | 0.89     | 2.29       | 3.164(3)   | 167.0                |
| O(4)-H(15)...F(1)   | 0.87     | 2.58       | 3.123(2)   | 121.3                |
| O(4)-H(15)...O(1)   | 0.87     | 1.93       | 2.799(2)   | 174.5                |
| O(4)-H(16)...O(1)#1 | 0.87     | 2.05       | 2.882(2)   | 160.3                |

Symmetry transformations used to generate equivalent atoms:

#1  $x+1, y, z$  #2  $-x+1, -y+1, -z$  #3  $x-1, -y+3/2, z-1/2$

#4  $x-1, y, z$  #5  $-x+2, -y+1, -z+1$  #6  $-x, y-1/2, -z+1/2$

#7  $-x, y+1/2, -z+1/2$  #8  $x-1, -y+3/2, z+1/2$  #9  $x, -y+3/2, z+1/2$

# SUPPORTING

**Table S9.** Comparison of the optical properties of monofluorophosphates and difluorophosphates.

|    | Compound                                                                                                             | Space group                                           | Cutoff edge (nm) | Birefringence                | Ref.      |
|----|----------------------------------------------------------------------------------------------------------------------|-------------------------------------------------------|------------------|------------------------------|-----------|
| 1  | (C <sub>4</sub> N <sub>4</sub> H <sub>11</sub> ) <sub>2</sub> PO <sub>3</sub> F·H <sub>2</sub> O                     | <i>P</i> $\bar{1}$                                    | 267 <sup>b</sup> | 0.165 @ 546 nm <sup>d</sup>  | This work |
| 2  | (CN <sub>4</sub> H <sub>7</sub> ) <sub>2</sub> PO <sub>3</sub> F·H <sub>2</sub> O                                    | <i>P</i> 2 <sub>1</sub> / <i>c</i>                    | 214 <sup>b</sup> | 0.116 @ 546 nm <sup>d</sup>  | This work |
| 3  | K <sub>3</sub> Sc <sub>3</sub> (PO <sub>4</sub> )(PO <sub>3</sub> F) <sub>2</sub> F <sub>5</sub>                     | <i>Cc</i>                                             | 200 <sup>a</sup> | 0.026 @ 546 nm <sup>d</sup>  | 13        |
| 4  | Cd <sub>2.5</sub> (NH <sub>4</sub> ) <sub>2</sub> (PO <sub>3</sub> F) <sub>3</sub> Cl·2H <sub>2</sub> O              | <i>P</i> 2 <sub>1</sub> / <i>c</i>                    | 215 <sup>a</sup> | 0.012 @ 546 nm <sup>e</sup>  | 14        |
| 5  | (NH <sub>4</sub> ) <sub>2</sub> PO <sub>3</sub> F                                                                    | <i>Pna</i> 2 <sub>1</sub>                             | 177 <sup>b</sup> | 0.027 @ 1064 nm <sup>d</sup> | 15        |
| 6  | Na <sub>2</sub> PO <sub>3</sub> F                                                                                    | <i>P</i> 2 <sub>1</sub> 2 <sub>1</sub> 2 <sub>1</sub> | 202 <sup>c</sup> | 0.028 @ 1064 nm <sup>d</sup> | 15        |
| 7  | K <sub>2</sub> PO <sub>3</sub> F                                                                                     | <i>Pnma</i>                                           | 183 <sup>c</sup> | 0.021 @ 1064 nm <sup>d</sup> | 15        |
| 8  | Rb <sub>2</sub> PO <sub>3</sub> F                                                                                    | <i>Pnma</i>                                           | 183 <sup>c</sup> | 0.020 @ 1064 nm <sup>d</sup> | 15        |
| 9  | Cs <sub>2</sub> PO <sub>3</sub> F                                                                                    | <i>Pnma</i>                                           | 179 <sup>c</sup> | 0.018 @ 1064 nm <sup>d</sup> | 15        |
| 10 | BaPO <sub>3</sub> F                                                                                                  | <i>P</i> 2 <sub>1</sub> / <i>c</i>                    | 159 <sup>c</sup> | 0.010 @ 1064 nm <sup>d</sup> | 15        |
| 11 | NaK <sub>3</sub> (PO <sub>3</sub> F) <sub>2</sub>                                                                    | <i>P</i> $\bar{3}$ <i>m</i> 1                         | 179 <sup>c</sup> | 0.021 @ 1064 nm <sup>d</sup> | 15        |
| 12 | K <sub>2</sub> P <sub>2</sub> O <sub>5</sub> F <sub>2</sub>                                                          | <i>C</i> 2/ <i>c</i>                                  | 160 <sup>c</sup> | 0.023 @ 1064 nm <sup>d</sup> | 15        |
| 13 | NaNH <sub>4</sub> PO <sub>3</sub> F·H <sub>2</sub> O                                                                 | <i>Pn</i>                                             | 176 <sup>b</sup> | 0.035 @ 532 nm <sup>d</sup>  | 16        |
| 14 | KHPO <sub>3</sub> F                                                                                                  | <i>P</i> 2 <sub>1</sub>                               | 179 <sup>c</sup> | 0.028 @ 532 nm <sup>d</sup>  | 16        |
| 15 | [C(NH <sub>2</sub> ) <sub>3</sub> ] <sub>2</sub> PO <sub>3</sub> F                                                   | <i>Cm</i>                                             | 194 <sup>b</sup> | 0.039 @ 532 nm <sup>d</sup>  | 16        |
| 16 | (NH <sub>4</sub> ) <sub>3</sub> [PO <sub>3</sub> F][BF <sub>4</sub> ]                                                | <i>P</i> 2 <sub>1</sub> / <i>m</i>                    | 190 <sup>a</sup> | 0.012 @ 1064 nm <sup>d</sup> | 17        |
| 17 | $\alpha$ -Cd(NH <sub>4</sub> ) <sub>2</sub> (PO <sub>3</sub> F) <sub>2</sub> ·2H <sub>2</sub> O                      | <i>P</i> 2 <sub>1</sub> / <i>n</i>                    | 200 <sup>a</sup> | 0.015 @ 546 nm <sup>e</sup>  | 18        |
| 18 | $\beta$ -Cd(NH <sub>4</sub> ) <sub>2</sub> (PO <sub>3</sub> F) <sub>2</sub> ·2H <sub>2</sub> O                       | <i>Cmc</i> 2 <sub>1</sub>                             | 200 <sup>a</sup> | 0.026 @ 546 nm <sup>e</sup>  | 18        |
| 19 | Ag <sub>2</sub> PO <sub>3</sub> F                                                                                    | <i>C</i> 2/ <i>c</i>                                  | 291 <sup>a</sup> | 0.032 @ 546 nm <sup>e</sup>  | 19        |
| 20 | KAg <sub>3</sub> (PO <sub>3</sub> F) <sub>2</sub>                                                                    | <i>P</i> 2/ <i>c</i>                                  | 256 <sup>a</sup> | 0.077 @ 546 nm <sup>e</sup>  | 19        |
| 21 | RbAg <sub>3</sub> (PO <sub>3</sub> F) <sub>2</sub>                                                                   | <i>P</i> 2/ <i>c</i>                                  | 256 <sup>a</sup> | 0.080 @ 546 nm <sup>e</sup>  | 19        |
| 22 | NH <sub>4</sub> Ag <sub>3</sub> (PO <sub>3</sub> F) <sub>2</sub>                                                     | <i>P</i> 3 <sub>1</sub> 21                            | 271 <sup>a</sup> | 0.101 @ 546 nm <sup>e</sup>  | 19        |
| 23 | KBaSr(PO <sub>2</sub> F <sub>2</sub> )(PO <sub>3</sub> F) <sub>2</sub>                                               | <i>P</i> 2 <sub>1</sub> / <i>c</i>                    | 200 <sup>a</sup> | 0.042 @ 550 nm <sup>e</sup>  | 20        |
| 24 | Na <sub>1.5</sub> Rb <sub>0.5</sub> PO <sub>3</sub> F·H <sub>2</sub> O                                               | <i>Pmn</i> 2 <sub>1</sub>                             | 200 <sup>a</sup> | 0.040 @ 546 nm <sup>e</sup>  | 21        |
| 25 | (N <sub>2</sub> H <sub>6</sub> )[HPO <sub>3</sub> F] <sub>2</sub>                                                    | <i>C</i> 2/ <i>m</i>                                  | 200 <sup>a</sup> | 0.077 @ 1064 nm <sup>d</sup> | 22        |
| 26 | SnPO <sub>3</sub> F                                                                                                  | <i>P</i> 2 <sub>1</sub> / <i>c</i>                    | 258 <sup>c</sup> | 0.075 @ 1064 nm <sup>d</sup> | 23        |
| 27 | SrPO <sub>3</sub> F                                                                                                  | <i>P</i> 2 <sub>1</sub> / <i>c</i>                    | 173 <sup>c</sup> | 0.034 @ 1064 nm <sup>d</sup> | 23        |
| 28 | (NH <sub>4</sub> ) <sub>3</sub> [Sc <sub>3</sub> F <sub>5</sub> (PO <sub>4</sub> )(PO <sub>3</sub> F) <sub>2</sub> ] | <i>Cc</i>                                             | 200 <sup>b</sup> | 0.010 @ 550 nm <sup>e</sup>  | 24        |
| 29 | (C <sub>3</sub> N <sub>6</sub> H <sub>7</sub> ) <sub>2</sub> PO <sub>3</sub> F·4H <sub>2</sub> O                     | <i>P</i> 2 <sub>1</sub> / <i>n</i>                    | 231 <sup>a</sup> | 0.38 @ 546 nm <sup>d</sup>   | 25        |
| 30 | SrPO <sub>3</sub> F·H <sub>2</sub> O                                                                                 | <i>P</i> 2 <sub>1</sub> / <i>c</i>                    | 216 <sup>c</sup> | 0.037 @ 546 nm <sup>d</sup>  | 19        |
| 31 | LiNH <sub>4</sub> PO <sub>3</sub> F                                                                                  | <i>P</i> 2 <sub>1</sub> / <i>c</i>                    | 184 <sup>c</sup> | 0.034 @ 546 nm <sup>d</sup>  | 19        |
| 32 | LiKPO <sub>3</sub> F·H <sub>2</sub> O                                                                                | <i>P</i> 2 <sub>1</sub> / <i>c</i>                    | 247 <sup>c</sup> | 0.017 @ 546 nm <sup>d</sup>  | 19        |
| 33 | CdPO <sub>3</sub> F·2H <sub>2</sub> O                                                                                | <i>P</i> $\bar{1}$                                    | 340 <sup>c</sup> | 0.038 @ 546 nm <sup>d</sup>  | 19        |
| 34 | Mg(NH <sub>4</sub> ) <sub>2</sub> (PO <sub>3</sub> F) <sub>2</sub> ·2H <sub>2</sub> O                                | <i>C</i> 2/ <i>m</i>                                  | 261 <sup>c</sup> | 0.046 @ 546 nm <sup>d</sup>  | 19        |
| 35 | CaPO <sub>3</sub> F·2H <sub>2</sub> O                                                                                | <i>P</i> $\bar{1}$                                    | 241 <sup>c</sup> | 0.028 @ 546 nm <sup>d</sup>  | 19        |
| 36 | (NH <sub>4</sub> ) <sub>2</sub> PO <sub>3</sub> F·H <sub>2</sub> O                                                   | <i>P</i> 2 <sub>1</sub> / <i>c</i>                    | 251 <sup>c</sup> | 0.015 @ 546 nm <sup>d</sup>  | 19        |
| 37 | NH <sub>4</sub> PO <sub>2</sub> F <sub>2</sub>                                                                       | <i>Pnma</i>                                           | 152 <sup>c</sup> | 0.046 @ 1064 nm <sup>d</sup> | 15        |
| 38 | KPO <sub>2</sub> F <sub>2</sub>                                                                                      | <i>Pnma</i>                                           | 156 <sup>c</sup> | 0.047 @ 1064 nm <sup>d</sup> | 15        |
| 39 | CsPO <sub>2</sub> F <sub>2</sub>                                                                                     | <i>Pnma</i>                                           | 155 <sup>c</sup> | 0.045 @ 1064 nm <sup>d</sup> | 15        |
| 40 | [C(NH <sub>2</sub> ) <sub>3</sub> ] <sub>2</sub> PO <sub>2</sub> F <sub>2</sub>                                      | <i>Pnma</i>                                           | 180 <sup>c</sup> | 0.091 @ 532 nm <sup>d</sup>  | 26        |
| 41 | K <sub>4</sub> (PO <sub>2</sub> F <sub>2</sub> ) <sub>2</sub> (S <sub>2</sub> O <sub>7</sub> )                       | <i>C</i> 2/ <i>c</i>                                  | 200 <sup>a</sup> | 0.010 @ 546 nm <sup>e</sup>  | 27        |
| 42 | KLa(PO <sub>2</sub> F <sub>2</sub> ) <sub>4</sub>                                                                    | <i>P</i> 2 <sub>1</sub> / <i>c</i>                    | 180 <sup>b</sup> | 0.019 @ 546 nm <sup>e</sup>  | 28        |
| 43 | NH <sub>4</sub> La(PO <sub>2</sub> F <sub>2</sub> ) <sub>4</sub>                                                     | <i>P</i> 2 <sub>1</sub> / <i>c</i>                    | 190 <sup>a</sup> | 0.017 @ 546 nm <sup>e</sup>  | 28        |
| 44 | (NH <sub>4</sub> ) <sub>2</sub> Ba(PO <sub>2</sub> F <sub>2</sub> ) <sub>4</sub>                                     | <i>P</i> 2/ <i>n</i>                                  | 180 <sup>b</sup> | 0.022 @ 1064 nm <sup>d</sup> | 29        |
| 45 | NH <sub>4</sub> Mg(PO <sub>2</sub> F <sub>2</sub> ) <sub>3</sub>                                                     | <i>Cmcm</i>                                           | 222 <sup>c</sup> | 0.033 @ 546 nm <sup>d</sup>  | 29        |
| 46 | NH <sub>4</sub> Sr(PO <sub>2</sub> F <sub>2</sub> ) <sub>3</sub>                                                     | <i>P</i> $\bar{1}$                                    | 214 <sup>c</sup> | 0.035 @ 546 nm <sup>d</sup>  | 29        |
| 47 | Ba(PO <sub>2</sub> F <sub>2</sub> ) <sub>2</sub>                                                                     | <i>I</i> $\bar{4}$ 2/ <i>d</i>                        | 214 <sup>c</sup> | 0.011 @ 546 nm <sup>d</sup>  | 29        |

<sup>a</sup>diffuse reflection spectrum, <sup>b</sup>Transmittance spectrum, <sup>c</sup>calculated data from the reported references, <sup>d</sup>calculated birefringence, <sup>e</sup>measured birefringence.

# SUPPORTING

**Table S10.** Real-space atom-cutting results of calculated birefringence for  $(\text{CN}_4\text{H}_7)_2\text{PO}_3\text{F}\cdot\text{H}_2\text{O}$  and  $(\text{C}_4\text{N}_4\text{H}_{11})_2\text{PO}_3\text{F}\cdot\text{H}_2\text{O}$ .

| Cut unit                                                                          | none  | $[\text{H}_2\text{O}]$ | $[\text{PO}_3\text{F}]$ | Cations |
|-----------------------------------------------------------------------------------|-------|------------------------|-------------------------|---------|
| $(\text{CN}_4\text{H}_7)_2\text{PO}_3\text{F}\cdot\text{H}_2\text{O}$             | 0.116 | 0.116                  | 0.100                   | 0.034   |
| $(\text{C}_4\text{N}_4\text{H}_{11})_2\text{PO}_3\text{F}\cdot\text{H}_2\text{O}$ | 0.165 | 0.165                  | 0.151                   | 0.046   |

Figure S1. TG-DSC curves of (a)  $(\text{CN}_4\text{H}_7)_2\text{PO}_3\text{F}\cdot\text{H}_2\text{O}$  and (b)  $(\text{C}_4\text{N}_4\text{H}_{11})_2\text{PO}_3\text{F}\cdot\text{H}_2\text{O}$ . Experimental powder XRD patterns at different temperatures of (c)  $(\text{CN}_4\text{H}_7)_2\text{PO}_3\text{F}\cdot\text{H}_2\text{O}$  and (d)  $(\text{C}_4\text{N}_4\text{H}_{11})_2\text{PO}_3\text{F}\cdot\text{H}_2\text{O}$ .

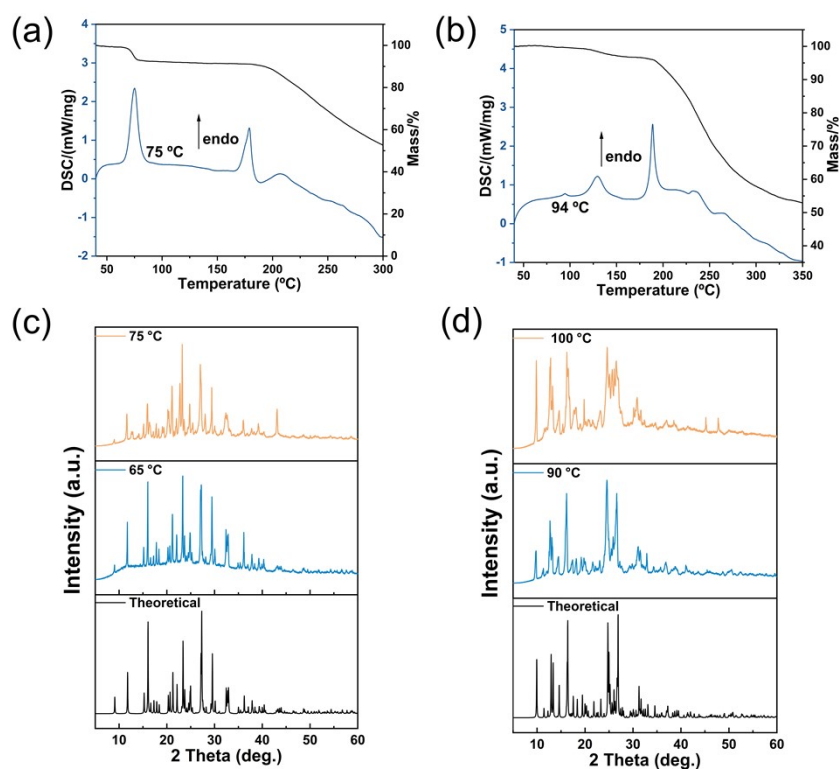

## SUPPORTING

Figure S2. IR spectra of (a)  $(\text{CN}_4\text{H}_7)_2\text{PO}_3\text{F}\cdot\text{H}_2\text{O}$  and (b)  $(\text{C}_4\text{N}_4\text{H}_{11})_2\text{PO}_3\text{F}\cdot\text{H}_2\text{O}$ .

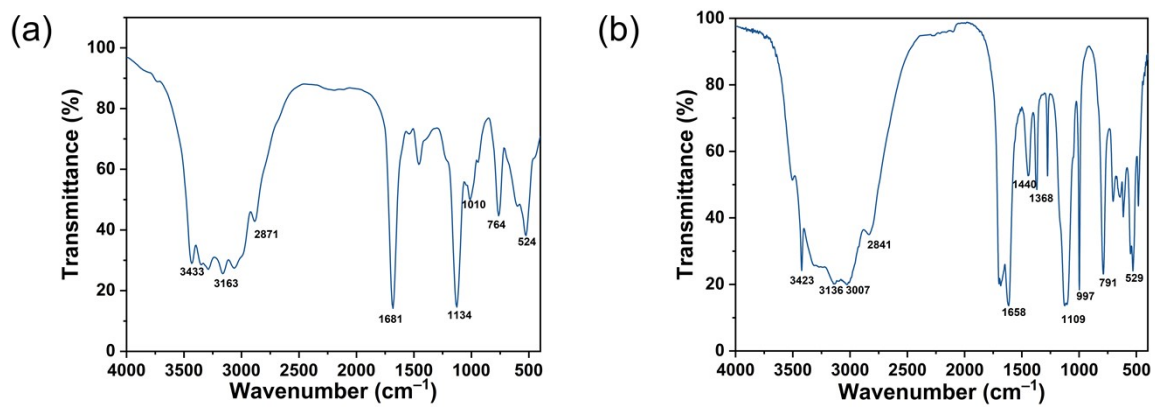

## SUPPORTING

Figure S3. Directions of  $n_{\max}$  and  $n_{\min}$  for planar  $\pi$ -conjugated units in (a)  $(\text{CN}_4\text{H}_7)_2\text{PO}_3\text{F}\cdot\text{H}_2\text{O}$  and (b)  $(\text{C}_4\text{N}_4\text{H}_{11})_2\text{PO}_3\text{F}\cdot\text{H}_2\text{O}$ . Red and blue arrows mean the directions of  $n_{\max}$  and  $n_{\min}$ , respectively.

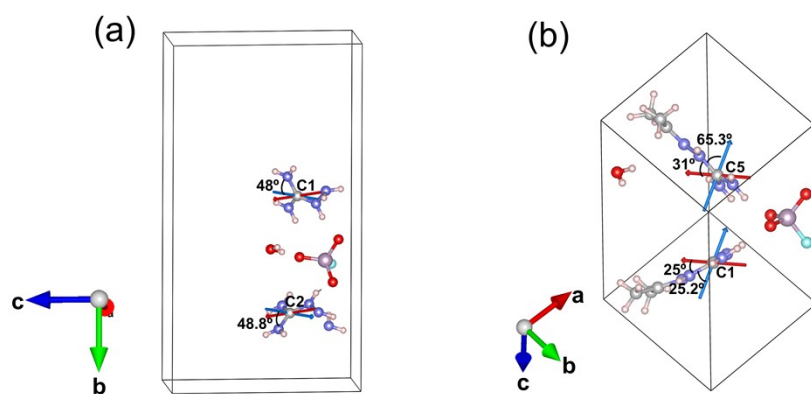

## References

- [1] SAINT Plus, Version 7.60A; Bruker Analytical X-ray Instruments, **2000**
- [2] O. V. Dolomanov, L. J. Bourhis, R. J. Gildea, J. A. K. Howard and H. Puschmann, *J. Appl. Crystallogr.* 2009, **42**, 339-341.
- [3] G. M. Sheldrick, *Acta Crystallogr. C* 2015, **71**, 3-8.
- [4] A. L. Spek, *J. Appl. Crystallogr.* 2003, **36**, 7-13.
- [5] J. S. Lin, A. Qteish, M. C. Payne and V. Heine, *Phys. Rev. B*, 1993, **47**, 4174.
- [6] A. M. Rappe, K. M. Rabe, E. Kaxiras and J. D. Joannopoulos, *Phys. Rev. B* 1990, **41**, 1227.
- [7] J. P. Perdew, K. Burke, M. Ernzerhof, *Phys. Rev. Lett.* 1996, **77**, 3865.
- [8] M. J. Frisch, G. W. Trucks, H. B. Schlegel, G. E. Scuseria, M. A. Robb, J. R. Cheeseman, G. Scalmani, V. Barone, B. Mennucci, G. A. Petersson, H. Nakatsuji, M. Caricato, X. Li, H. P. Hratchian, A. F. Izmaylov, J. Bloino, G. Zheng, J. L. Sonnenberg, M. Hada, M. Ehara, K. Toyota, R. Fukuda, J. Hasegawa, M. Ishida, T. Nakajima, Y. Honda, O. Kitao, H. Nakai, T. Vreven, J. A. Montgomery, Jr., J. E. Peralta, F. Ogliaro, M. Bearpark, J. J. Heyd, E. Brothers, K. N. Kudin, V. N. Staroverov, R. Kobayashi, J. Normand, K. Raghavachari, A. Rendell, J. C. Burant, S. S. Iyengar, J. Tomasi, M. Cossi, N. Rega, J. M. Millam, M. Klene, J. E. Knox, J. B. Cross, V. Bakken, C. Adamo, J. Jaramillo, J. Gomperts, R. E. Stratmann, O. Yazyev, A. J. Austin, R. Cammi, C. Pomelli, J. W. Ochterski, R. L. Martin, K. Morokuma, V. G. Zakrzewski, G. A. Voth, P. Salvador, J. J. Dannenberg, S. Dapprich, A. D. Daniels, O. Farkas, J. B. Foresman, J. V. Ortiz, J. Cioslowski, D. J. Fox, *Gaussian 09*, Revision A.02, Gaussian, Inc., Wallingford CT **2009**.
- [9] Y. Li, A. Chernikov and X. Zhang, *Phys. Rev. B*, 2014, **90**, 205422-205428.
- [10] S. Adachi, *Phys. Rev. B*, 1987, **35**, 7454-7463.
- [11] M. Gajdoš, K. Hummer and G. Kresse, *Phys. Rev. B*, 2006, **73**, 045112-045121.
- [12] E. Zahedi, B. Xiao and M. Shayestefar, *Inorg. Chem.*, 2016, **55**, 4824-4835.
- [13] Q. Ding, X. Zhang, Z. Lin, Z. Xiong, Y. Wang, X. Long, S. Zhao, M. Hong and J. Luo, *Sci. China Chem.*, 2022, **65**, 1710-1714
- [14] X.-R. Yang, X. Liu, L. Chen and L.-M. Wu, *Z. Anorg. Allg. Chem.*, 2022, **648**, e202200034.
- [15] B. B. Zhang, G. P. Han, Y. Wang, X. L. Chen, Z. H. Yang and S. L. Pan, *Chem. Mater.*, 2018, **30**, 5397-5403.
- [16] L. Xiong, J. Chen, J. Lu, C.-Y. Pan and L.-M. Wu, *Chem. Mater.*, 2018, **30**, 7823-7830.
- [17] H. T. Qiu, W. B. Cai, Z. H. Yang, Y. L. Liu, M. Mutailipu and S. L. Pan, *ACS Org. Inorg. Au*, 2021, **1**, 6-10.
- [18] X.-R. Yang, X. Liu, X.-B. Deng, L. Chen and L.-M. Wu, *Mater. Today Phys.*, 2023, **31**, 100999.
- [19] J. Guo, J. Han, H. Chen, Y. Qi, S. Li, R. Wang, Q. Jing, L. M. Wu and L. Chen, *Angew. Chem. Int. Ed.*, 2025, DOI: 10.1002/anie.202512952, e202512952.
- [20] T. Ouyang, J. Qi, Y. Li, S. Chen, W. Huang, Z. Bai, S. Zhao and J. Luo, *Inorg. Chem. Front.*, 2025, **12**, 5741-5747.
- [21] X.-R. Yang, X. Liu, Z. Wang, X.-B. Deng, H.-J. Lu, Y.-J. Li, X. Long, L. Chen and L.-M. Wu, *Inorg. Chem. Front.*, 2021, **8**, 4544-4552.
- [22] H. Qiu, F. Li, C. Jin, J. Lu, Z. Yang, S. Pan and M. Mutailipu, *Chem Commun*, 2022, **58**, 5594-5597.
- [23] Y. Qian, Q. Jing, H. Duan, M.-H. Lee and H. Cao, *Phys. B: Condens. Matter*, 2022, **630**, 413676.
- [24] S. Chen, Z. Bai, X. Song, T. Ouyang, Y. Li, Q. Ding, H. Wang, W. Chen, J. Luo and S. Zhao, *Small*, 2025, **21**, 2408191.
- [25] H. Jia, X. Song, M. Arif, Y. Jin, F. Yu and X. Hou, *Inorg. Chem.*, 2025, **64**, 22393-22401.
- [26] W. Zhang, M. Arif, H. Zhou, R. An, Z. Yang, X. Hou, S. Pan and S. Han, *Adv. Opt. Mater.*, 2025, **13**, 2403372.
- [27] W. Zhang, W. Jin, Z. Yang and S. Pan, *Dalton Trans.*, 2020, **49**, 17658-17664.
- [28] W. Zhang, Z. Wei, Z. Yang and S. Pan, *Dalton Trans.*, 2020, **49**, 11591-11596.
- [29] W. Zhang, W. Jin, M. Cheng, R. Zhang, Z. Yang and S. Pan, *Dalton Trans.*, 2021, **50**, 10206-10213.
